# Supplementary material
Source: PubMed Central journal article supplement (PMC7199446)

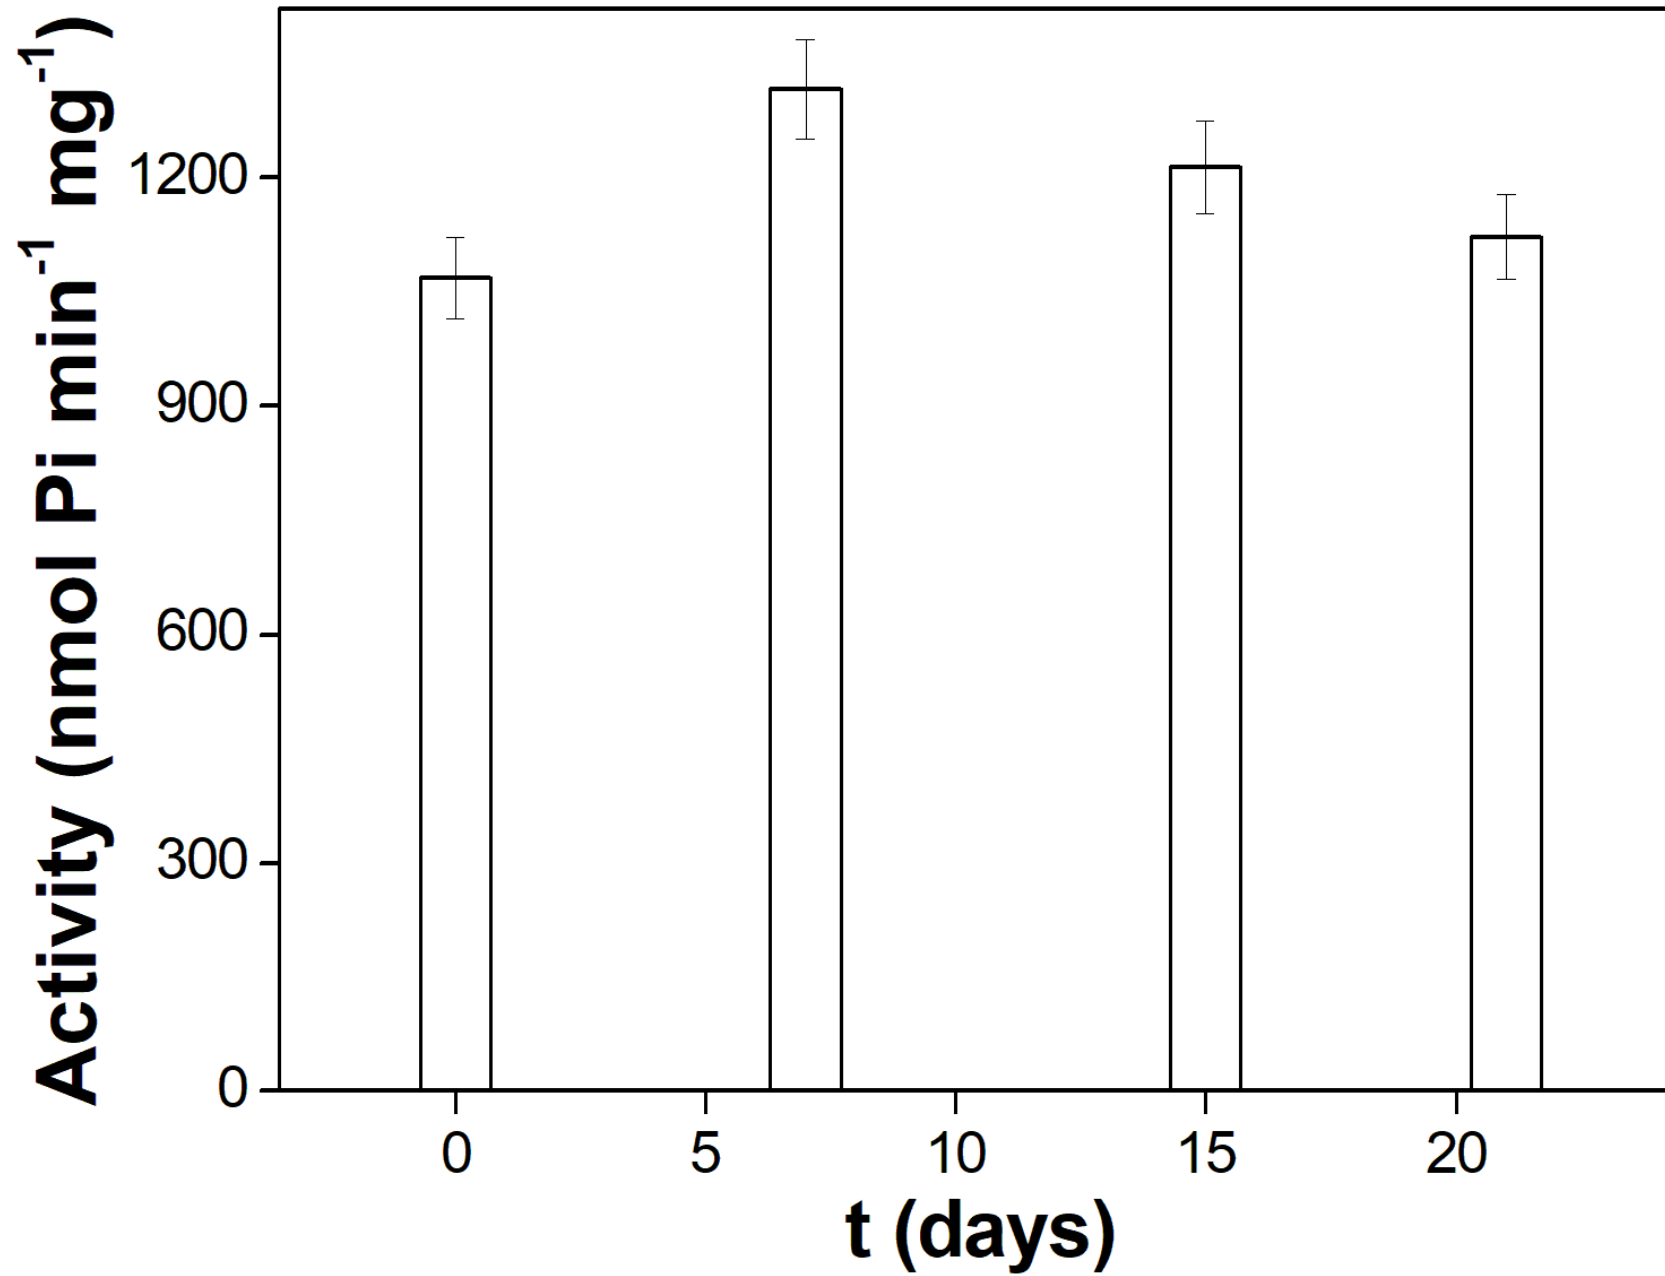

Supplement: NIHMS1577984-supplement-SFigure_1.pdf [file NIHMS1577984-supplement-SFigure_1.pdf]

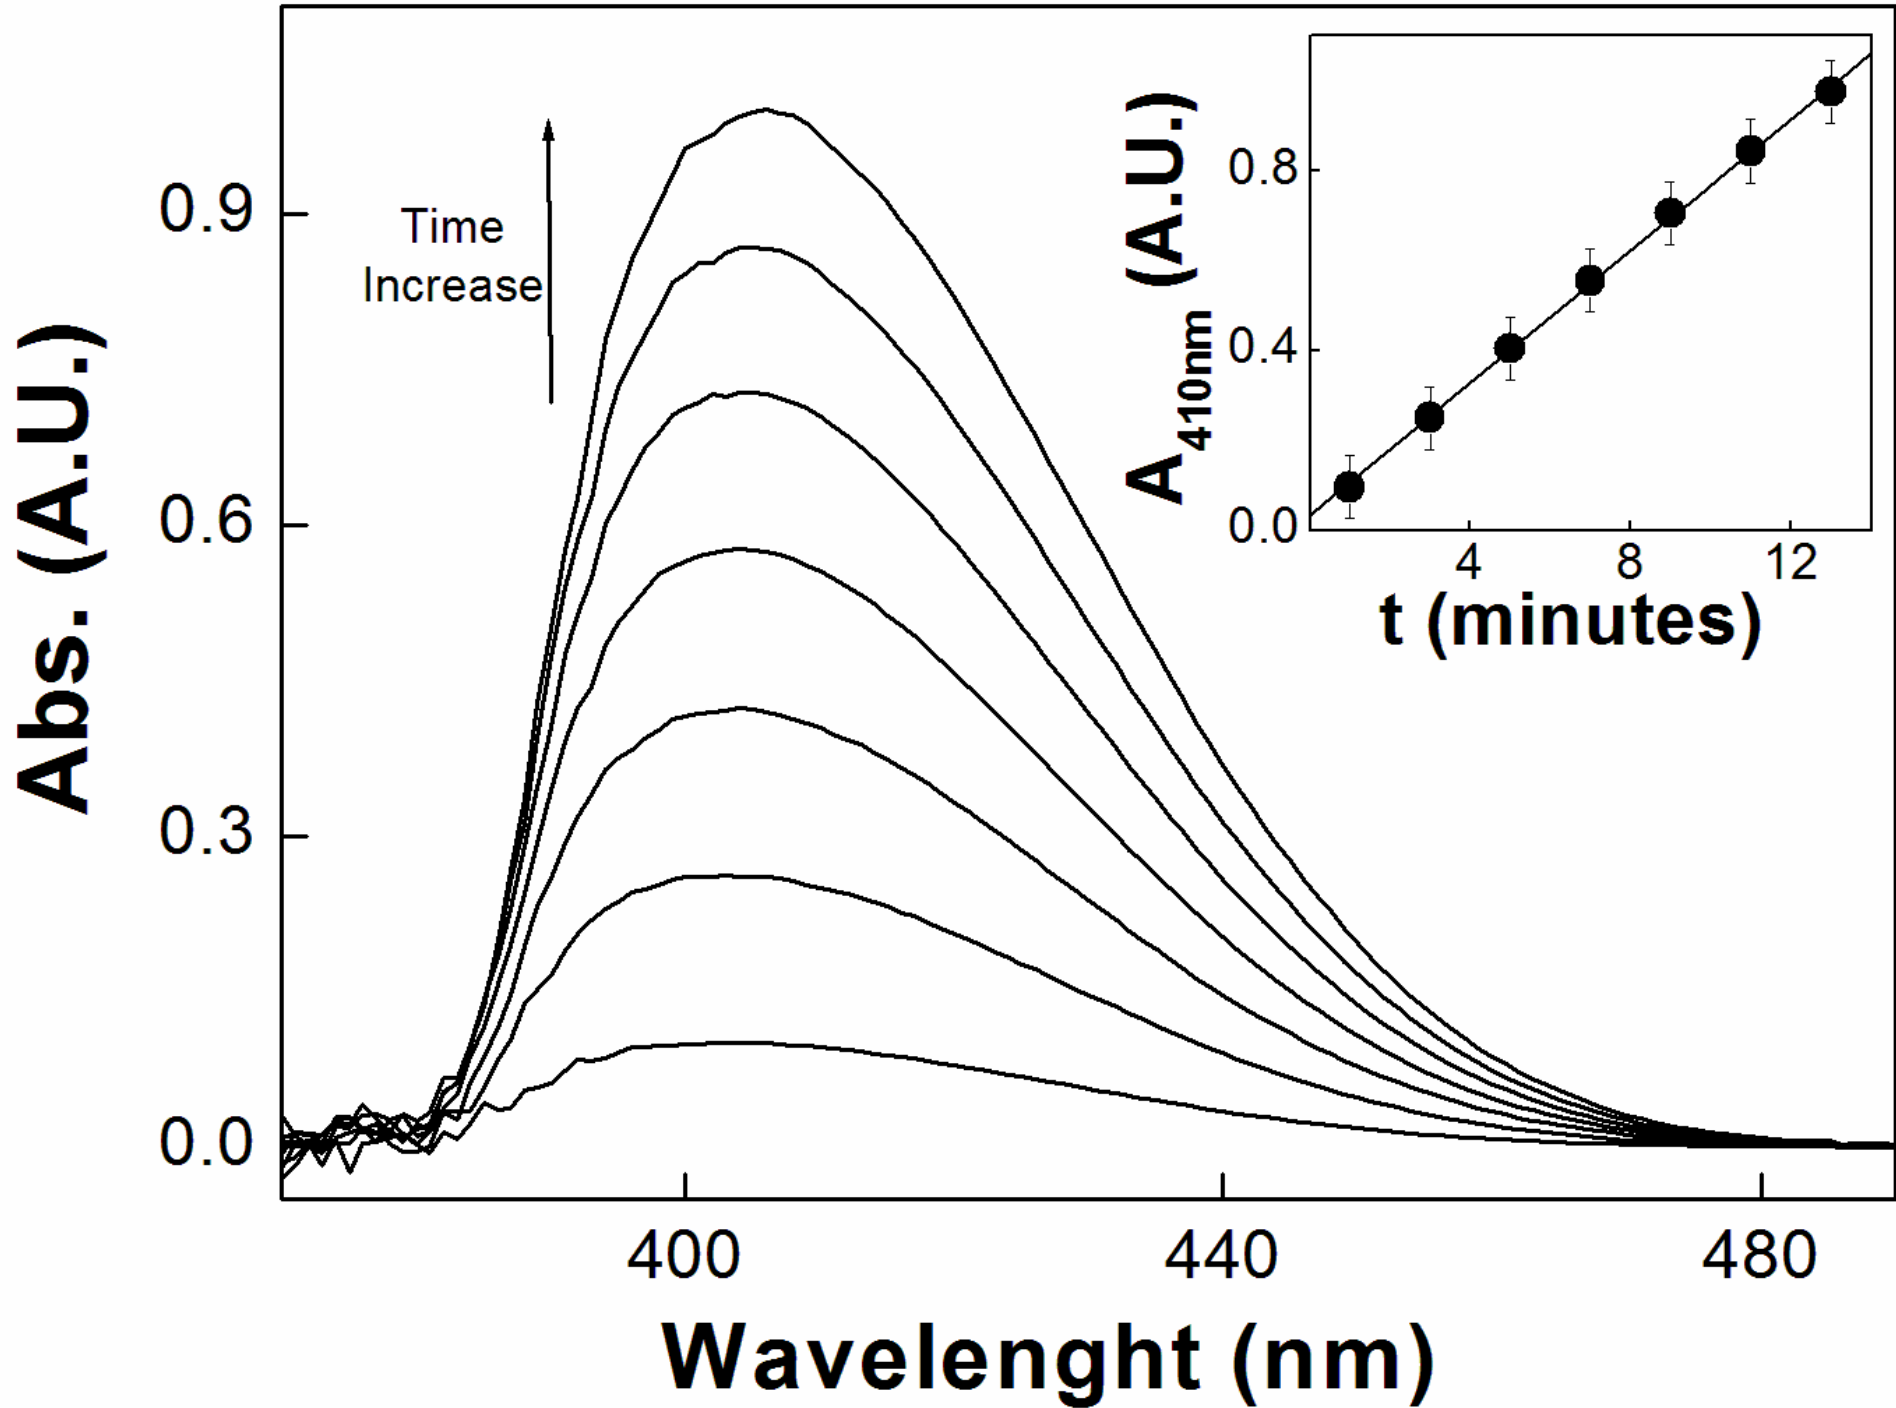

Supplement: NIHMS1577984-supplement-SFigure_2.pdf [file NIHMS1577984-supplement-SFigure_2.pdf]
